# Supplementary material
Source: Royal Society of Chemistry journal article supplement (doi:10.1039/d6ta00628k)
Supplement: d6ta00628k1.pdf [file d6ta00628k1.pdf]

## Supporting information

### Tungsten-modified MXene-integrated Spinel Oxides as High-Performance and Stable Catalysts for Water/Seawater Oxidation

Deepika Tanwar, P. Vignesh Raja, Padinjarethil Vishnu, and Ijjada Mahesh\*

Department of Chemical Engineering,  
Indian Institute of Science Education and Research Bhopal,  
Madhya Pradesh - 462066, India.

\*E-mail: [mahesh@iiserb.ac.in](mailto:mahesh@iiserb.ac.in); [mahesh.ijjada@gmail.com](mailto:mahesh.ijjada@gmail.com)

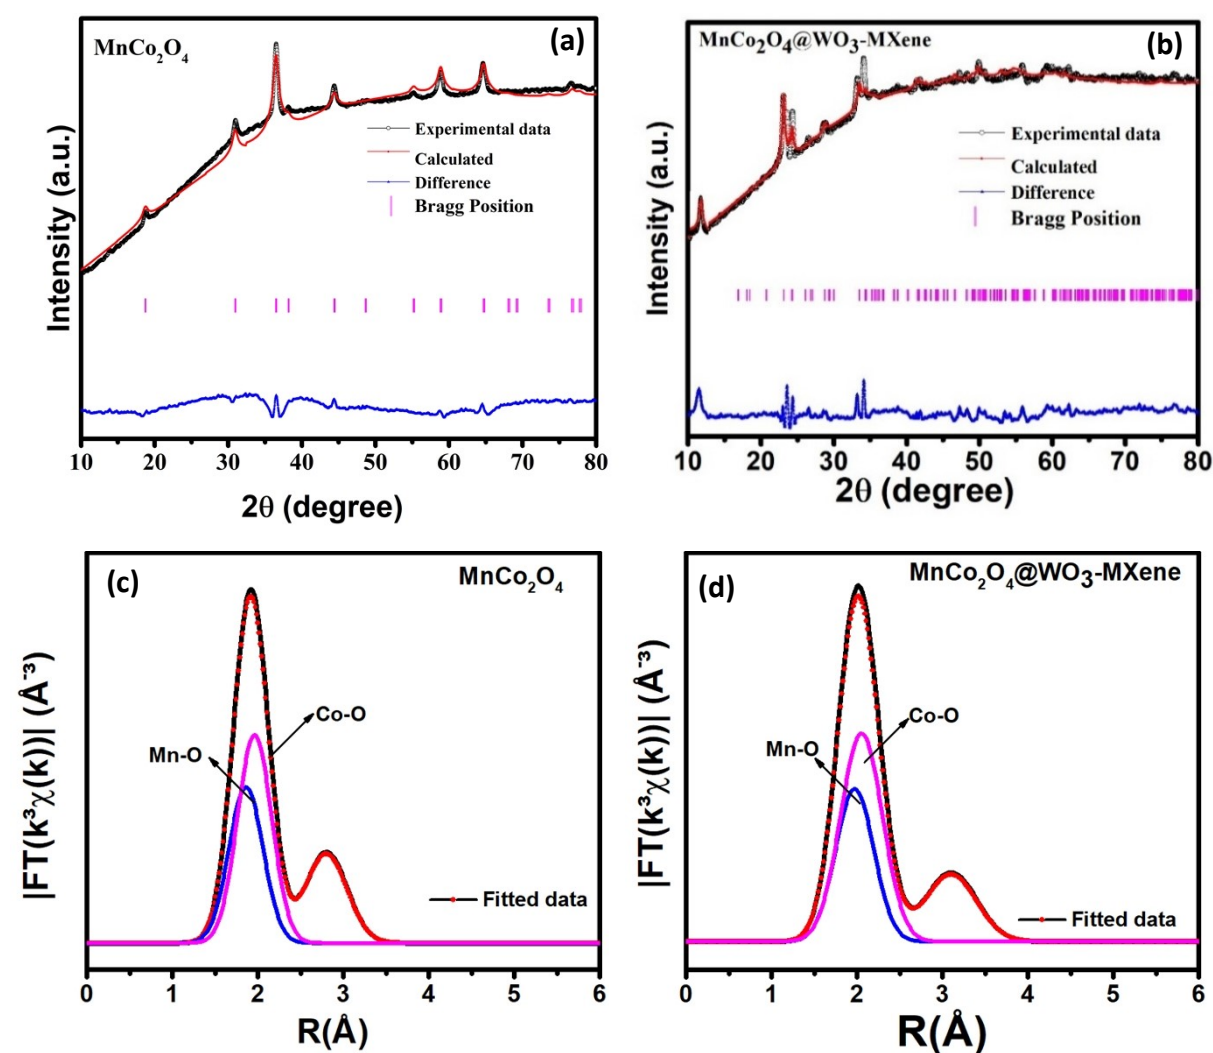

**Figure S1.** Rietveld refinement X-ray diffraction pattern of (a)  $\text{MnCo}_2\text{O}_4$  (b)  $\text{MnCo}_2\text{O}_4\text{-WO}_3\text{-MXene}$ ; FT fitting curves of (c)  $\text{MnCo}_2\text{O}_4$  and (d)  $\text{MnCo}_2\text{O}_4\text{-WO}_3\text{-MXene}$  at the  $k^3$ -weighted Co K-edge EXAFS.

**Table S1:** Rietveld refined structural parameter of MnCo<sub>2</sub>O<sub>4</sub> and MnCo<sub>2</sub>O<sub>4</sub>-WO<sub>3</sub>-MXene

|                                    |   | <b>MnCo<sub>2</sub>O<sub>4</sub></b> | <b>MnCo<sub>2</sub>O<sub>4</sub>-WO<sub>3</sub>-MXene</b> |
|------------------------------------|---|--------------------------------------|-----------------------------------------------------------|
| Lattice parameters                 | a | 8.15647                              | 8.7900                                                    |
|                                    | b | 8.15647                              | 8.7900                                                    |
|                                    | c | 8.15647                              | 8.7900                                                    |
| Unit cell volume (Å <sup>3</sup> ) |   | 542.622                              | 679.151                                                   |
| Goodness of fit Chi                |   | 2.19                                 | 1.18                                                      |
|                                    |   |                                      |                                                           |
| <b>Bond Type</b>                   |   | <b>Bond length</b>                   |                                                           |
| Mn-O                               |   | 1.6 Å <sup>0</sup>                   | 2.03 Å <sup>0</sup>                                       |
| Co-O                               |   | 1.97 Å <sup>0</sup>                  | 2.04 Å <sup>0</sup>                                       |
| Ti-C                               |   | -                                    | 1.89 Å <sup>0</sup>                                       |
| W-O                                |   | -                                    | 1.7 Å <sup>0</sup>                                        |

**Table S2:** BET surface area and pore size distribution of the as-prepared samples

| Compound                                           | BET surface area<br>( $\text{m}^2 \text{g}^{-1}$ ) | Pore Size<br>(nm) | Pore volume<br>( $\text{cm}^3/\text{g}$ ) |
|----------------------------------------------------|----------------------------------------------------|-------------------|-------------------------------------------|
| $\text{MnCo}_2\text{O}_4$                          | 55.21                                              | 0.98              | 0.3534                                    |
| $\text{MnCo}_2\text{O}_4\text{-WO}_3\text{-MXene}$ | 76.21                                              | 0.65              | 0.429                                     |

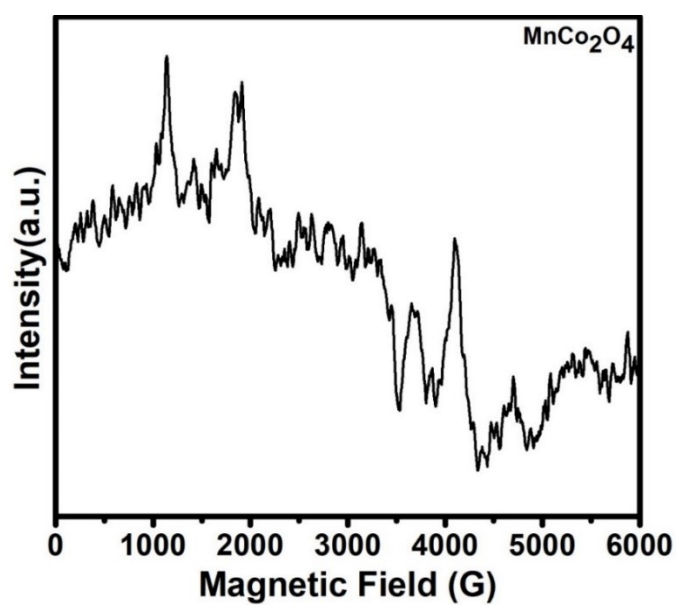

**Figure S2.** EPR spectra of  $\text{MnCo}_2\text{O}_4$

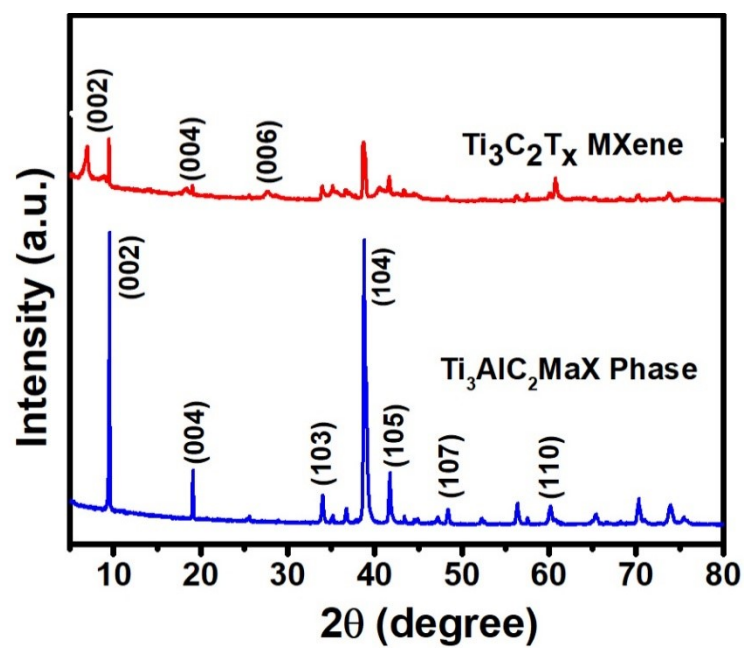

**Figure S3.** XRD spectra of MXene.

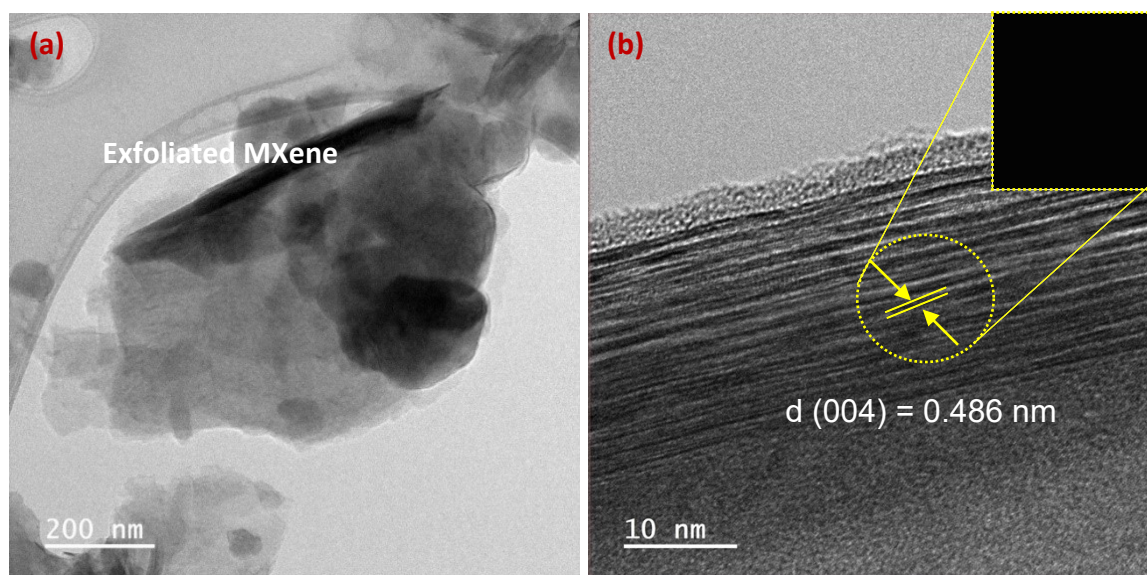

**Figure S4.** HRTEM image of MXene at (a) 200 nm, (b) 10 nm

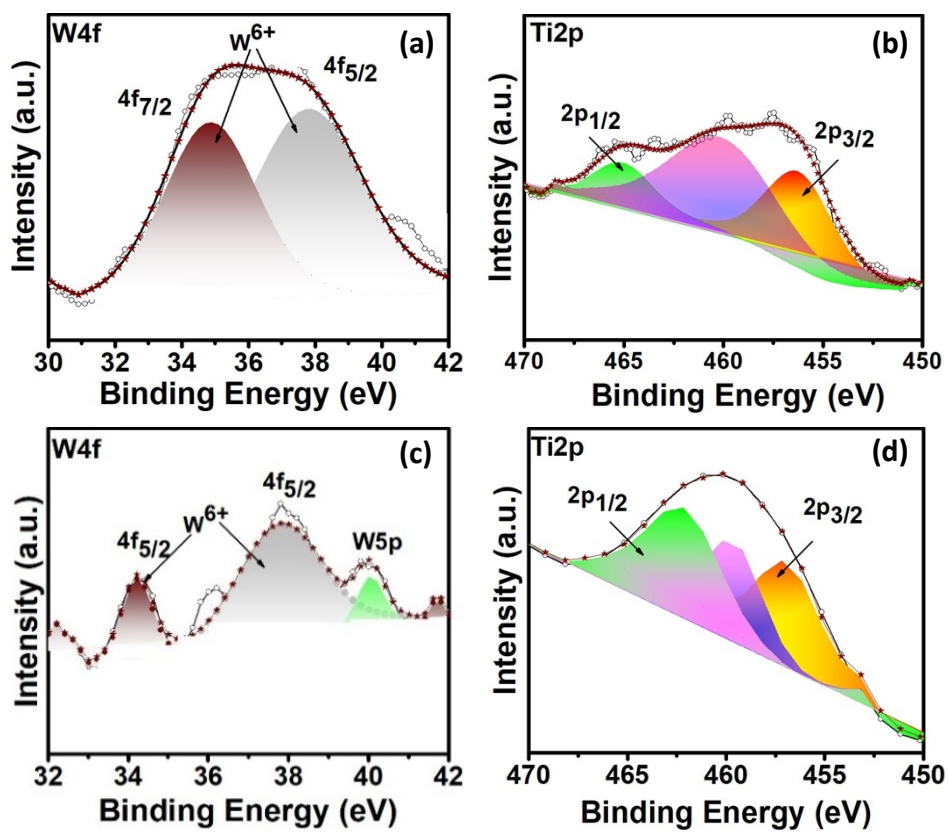

**Figure S5.** XPS spectra of MnCo<sub>2</sub>O<sub>4</sub>-WO<sub>3</sub>-MXene (a) W4f, (b) Ti2p (before), (c) W4f, (d) Ti2p (after)

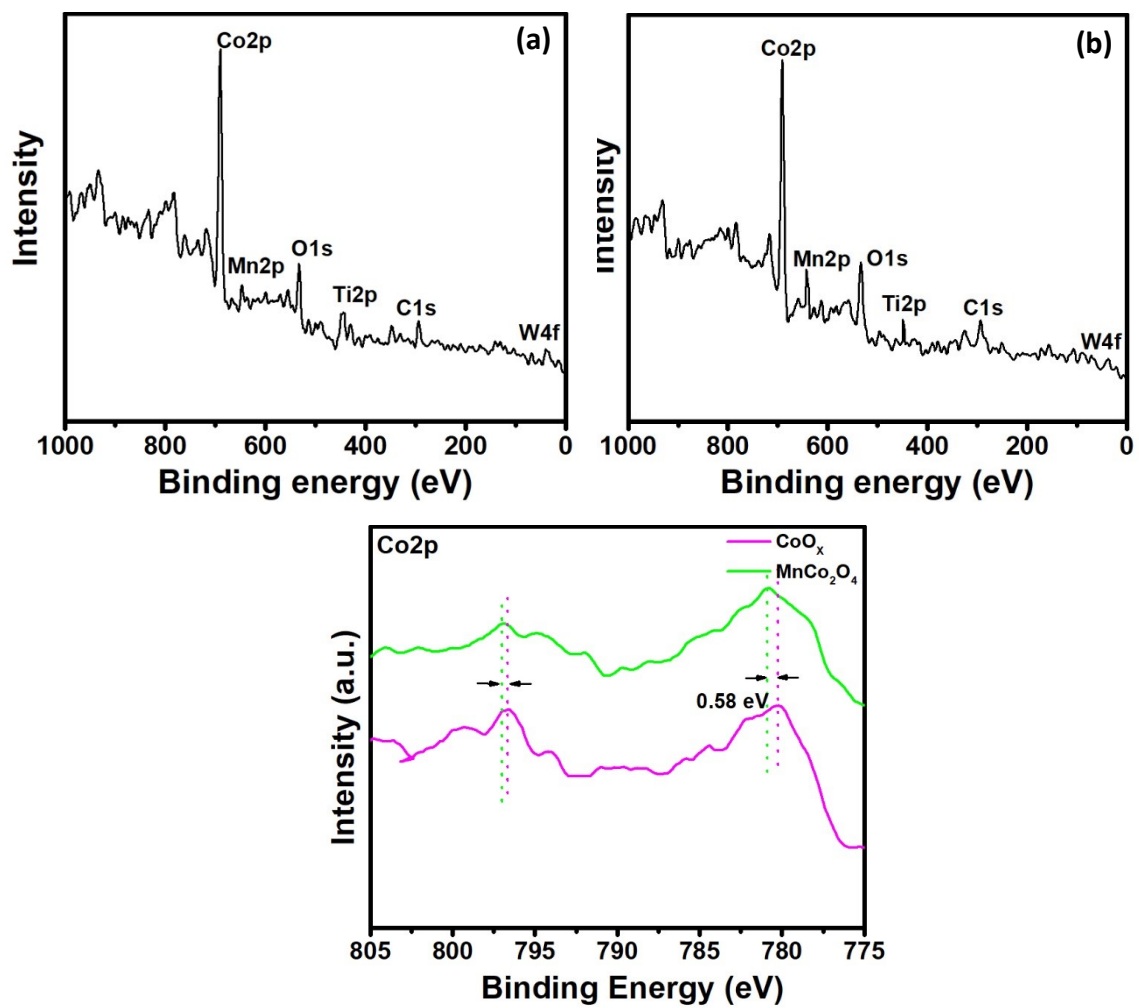

**Figure S6.** XPS survey spectra of MnCo<sub>2</sub>O<sub>4</sub>-WO<sub>3</sub>-MXene (a) before, (b) after stability test, (c) Co2p XPS spectra of CoO<sub>x</sub> and MnCo<sub>2</sub>O<sub>4</sub>

**Table S3:** XPS Mn2p and Co2p peak data of MnCo<sub>2</sub>O<sub>4</sub>-WO<sub>3</sub>-MXene and MnCo<sub>2</sub>O<sub>4</sub> before testing

| Samples                                                  | Peak                                           | Oxidation state                                | Peak position (eV)         | Average oxidation state |
|----------------------------------------------------------|------------------------------------------------|------------------------------------------------|----------------------------|-------------------------|
| MnCo <sub>2</sub> O <sub>4</sub> -WO <sub>3</sub> -MXene | Mn2p3/2                                        | Mn <sup>3+</sup>                               | 643.12                     | +2.4                    |
|                                                          |                                                | Mn <sup>2+</sup>                               | 641.77                     |                         |
|                                                          | Co2p3/2                                        | Co <sup>3+</sup><br>Co <sup>2+</sup>           | 779.75<br>782.70           | +2.5                    |
| Co2p1/2                                                  | Co <sup>3+</sup><br>Co <sup>2+</sup><br>(Sat.) | 794.80<br>797.48<br>801.70                     |                            |                         |
| MnCo <sub>2</sub> O <sub>4</sub>                         | Mn2p3/2                                        | Mn <sup>3+</sup>                               | 643.29                     | +2.3                    |
|                                                          |                                                | Mn <sup>2+</sup>                               | 642.05                     |                         |
|                                                          | Co2p3/2                                        | Co <sup>3+</sup><br>Co <sup>2+</sup><br>(Sat.) | 778.66<br>780.85<br>788.92 | +2.41                   |
| Co2p1/2                                                  | Co <sup>2+</sup><br>Co <sup>3+</sup>           | 797.88<br>794.82                               |                            |                         |

**Table S4:** XPS Mn2p and Co2p peak data of MnCo<sub>2</sub>O<sub>4</sub>-WO<sub>3</sub>-MXen after testing

| Samples                                                  | Peak                                 | Oxidation state                                | Peak position (eV)         | Average oxidation state |
|----------------------------------------------------------|--------------------------------------|------------------------------------------------|----------------------------|-------------------------|
| MnCo <sub>2</sub> O <sub>4</sub> -WO <sub>3</sub> -MXene | Mn2p3/2                              | Mn <sup>3+</sup>                               | 643.00                     | +2.68                   |
|                                                          |                                      | Mn <sup>2+</sup>                               | 642.05                     |                         |
|                                                          | Mn2p1/2                              | -                                              | 653.92                     |                         |
|                                                          | Co2p3/2                              | Co <sup>3+</sup><br>Co <sup>2+</sup><br>(Sat.) | 778.60<br>782.26<br>784.38 | +2.78                   |
| Co2p1/2                                                  | Co <sup>3+</sup><br>Co <sup>2+</sup> | 793.98<br>796.33                               |                            |                         |

**Table S5:** XPS analysis results of the as-prepared samples

| Compound                                                                                 | Co <sup>3+</sup> /Co <sup>2+</sup> | Mn <sup>3+</sup> /Mn <sup>2+</sup> | O <sub>v</sub> / O <sub>latt</sub> |
|------------------------------------------------------------------------------------------|------------------------------------|------------------------------------|------------------------------------|
| MnCo <sub>2</sub> O <sub>4</sub>                                                         | 0.72                               | 0.28                               | 0.45                               |
| MnCo <sub>2</sub> O <sub>4</sub> -WO <sub>3</sub> -MXene<br>(before)                     | 0.91                               | 0.47                               | 2.66                               |
| MnCo <sub>2</sub> O <sub>4</sub> -WO <sub>3</sub> -MXene<br>(after 100 h stability test) | 2.78                               | 2.19                               | 2.65                               |

**Table S6:** XPS W4f peak data of MnCo<sub>2</sub>O<sub>4</sub>-WO<sub>3</sub>-MXene before and after testing

| Samples                                                  |        | Peak   | Oxidation state | Peak position (eV) |
|----------------------------------------------------------|--------|--------|-----------------|--------------------|
| MnCo <sub>2</sub> O <sub>4</sub> -WO <sub>3</sub> -MXene | Before | W4f7/2 | W <sup>6+</sup> | 34.2               |
|                                                          |        | W4f5/2 |                 | 37.7               |
|                                                          | After  | W4f7/2 | W <sup>6+</sup> | 34.4               |
|                                                          |        | W4f5/2 |                 | 37.8               |
|                                                          |        | W5p    | -               | 40.04              |

**Table S7:** XPS TiO<sub>2</sub> peak data of MnCo<sub>2</sub>O<sub>4</sub>-WO<sub>3</sub>-MXene before and after testing

| Samples                                                  |        | Peak    | Peak position (eV) | Oxidation state                      |
|----------------------------------------------------------|--------|---------|--------------------|--------------------------------------|
| MnCo <sub>2</sub> O <sub>4</sub> -WO <sub>3</sub> -MXene | Before | Ti2p3/2 | 456.19<br>459.72   | Ti <sup>3+</sup><br>Ti <sup>2+</sup> |
|                                                          |        | Ti2p1/2 | 465.07             | -                                    |
|                                                          | After  | Ti2p3/2 | 456.87<br>459.89   | Ti <sup>3+</sup><br>Ti <sup>2+</sup> |
|                                                          |        | Ti2p1/2 | 462.05             | -                                    |

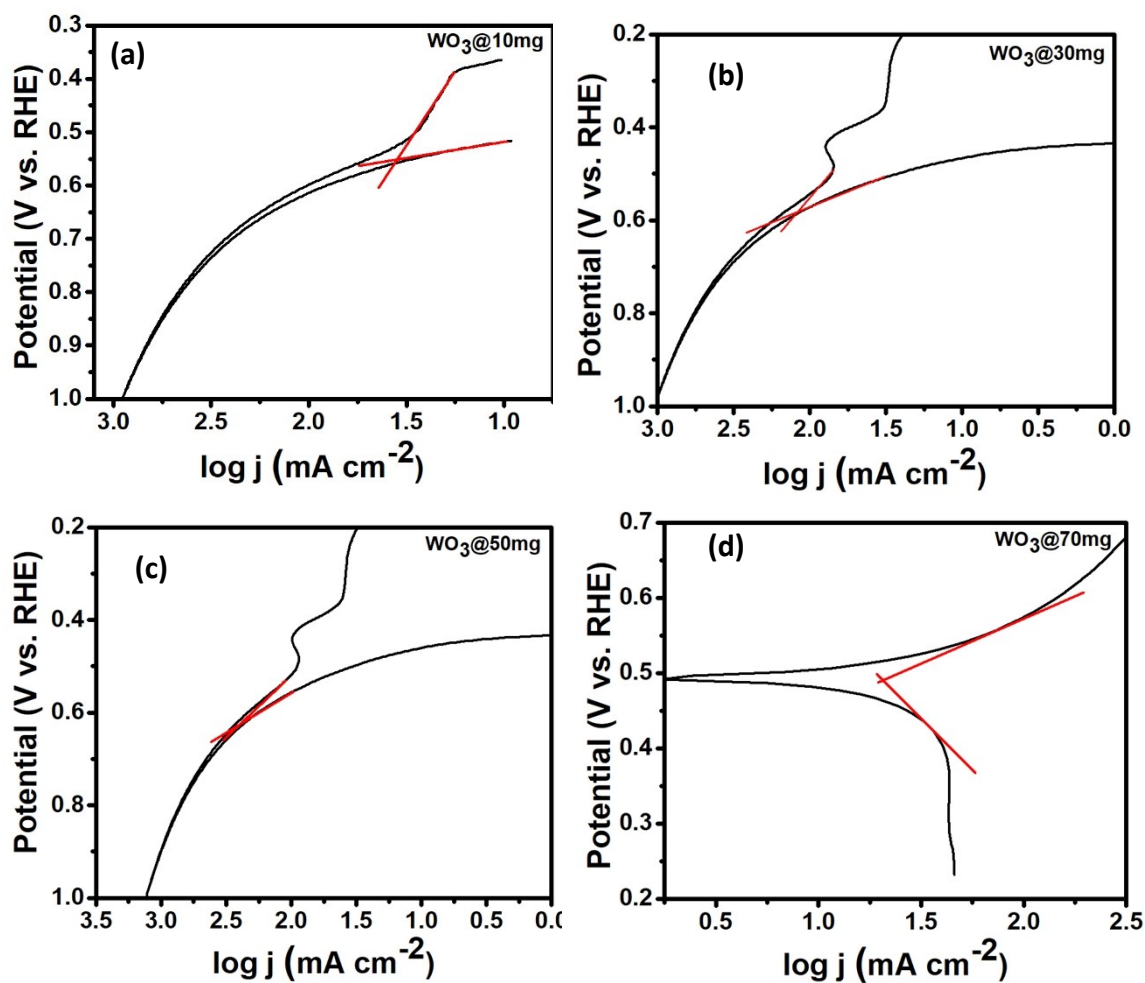

**Figure S7.** Corrosion test of  $\text{MnCo}_2\text{O}_4\text{-WO}_3\text{-MXene}$  at different concentrations of  $\text{WO}_3$

**Table S8:** Corrosion current density at different concentrations of  $\text{WO}_3$

| S.N. | $\text{WO}_3$ loading (mg) | Corrosion current density ( $\mu\text{A cm}^{-2}$ ) |
|------|----------------------------|-----------------------------------------------------|
| 1    | 0.1                        | 38.97                                               |
| 2    | 0.3                        | 7.24                                                |
| 3    | 0.5                        | 5.18                                                |
| 4    | 0.7                        | 29.51                                               |

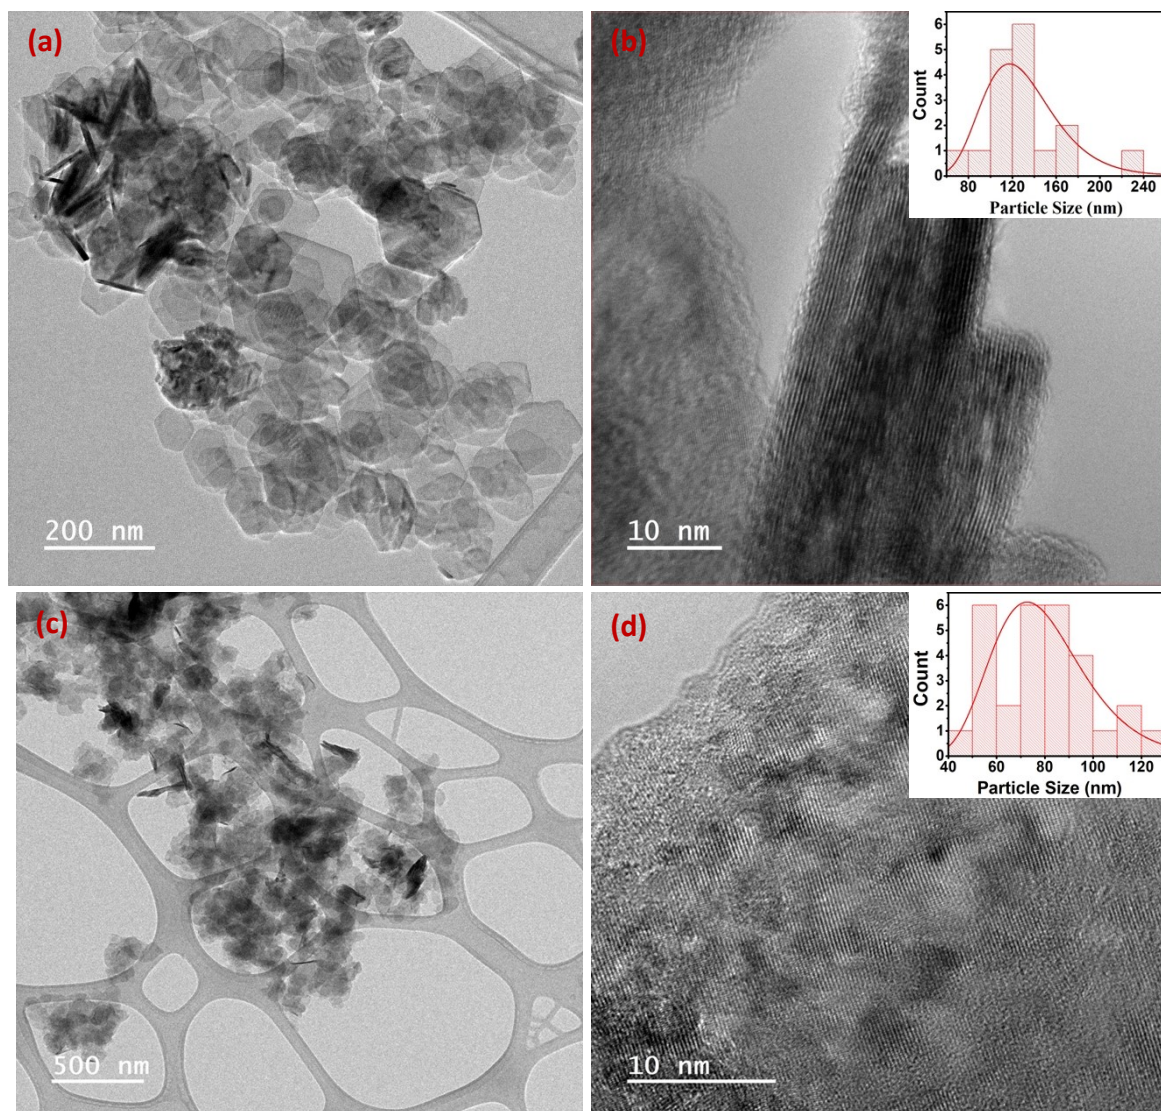

**Figure S8.** HRTEM image of MnCo<sub>2</sub>O<sub>4</sub>-WO<sub>3</sub>-MXene without CTAB at (a) 200 nm, (b) 10 nm and MnCo<sub>2</sub>O<sub>4</sub>-WO<sub>3</sub>-MXene with CTAB at (c) 500 nm, (d) 10 nm

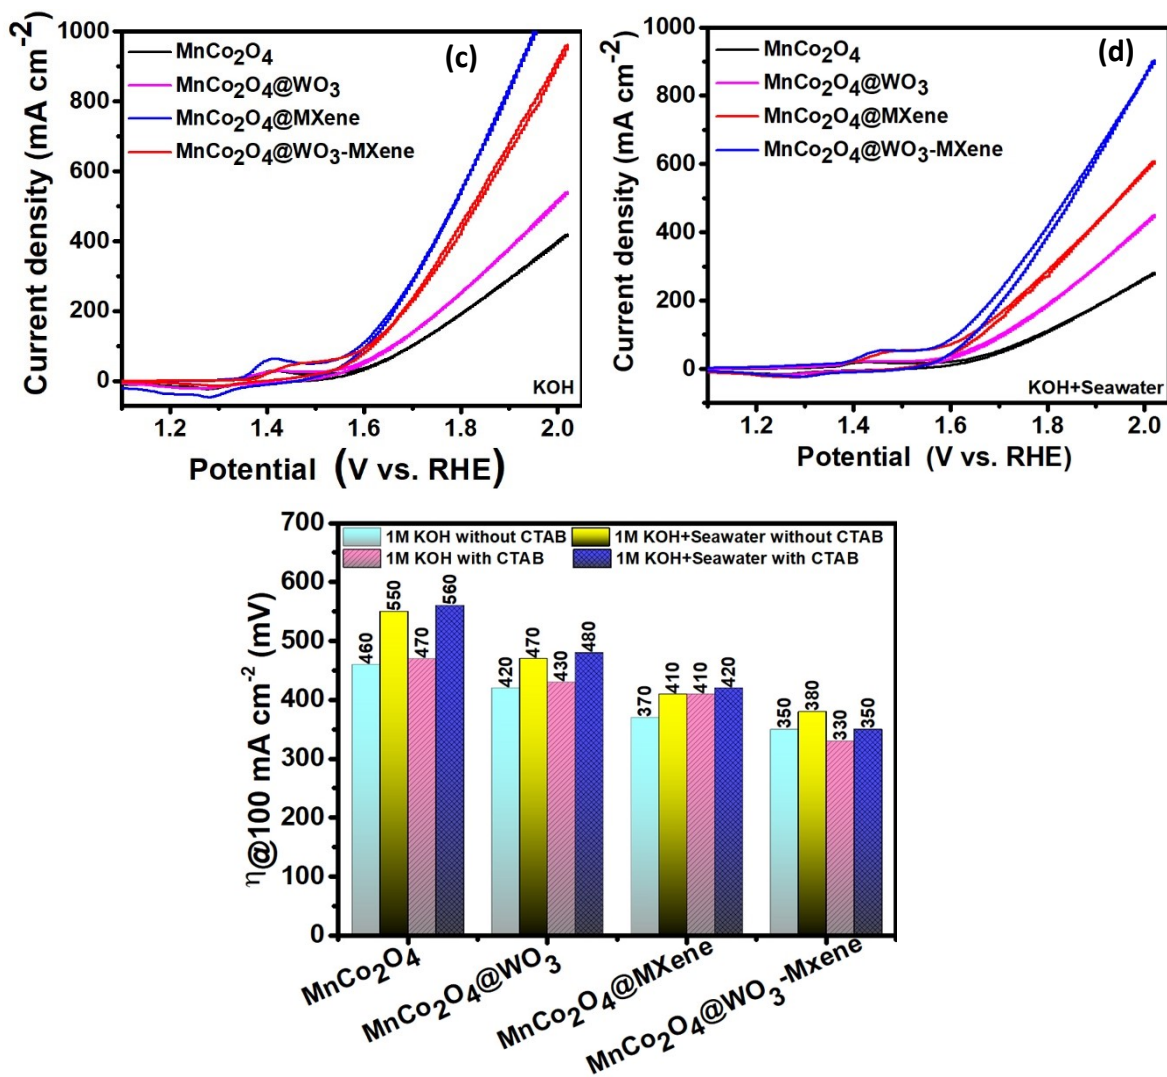

Figure S9. (a) CV curve in 1M KOH, (b) CV curve in alkaline seawater, and (c) overpotential graph without CTAB.

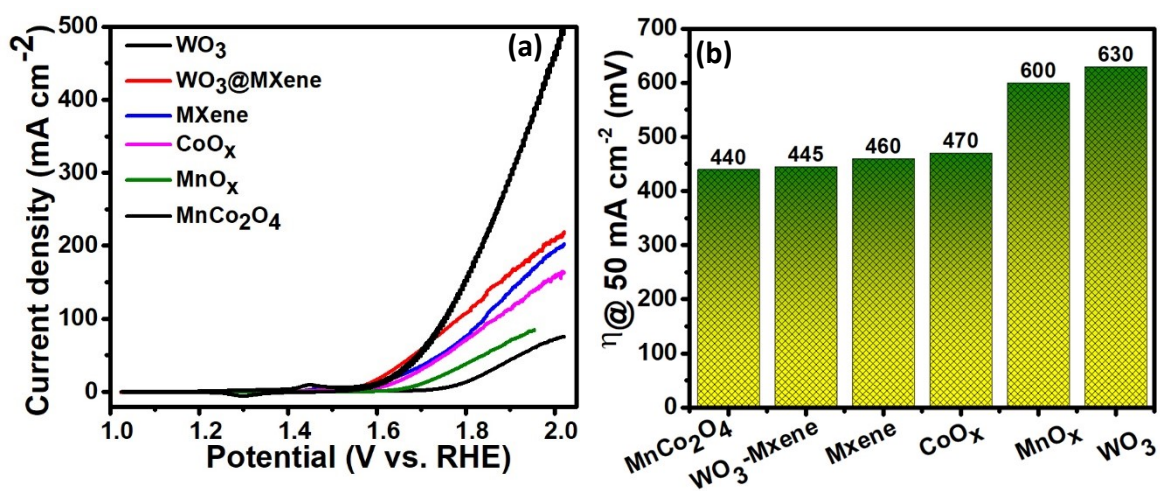

Figure S10. (a) CV curve and (b) overpotential of synthesized samples in alkaline seawater.

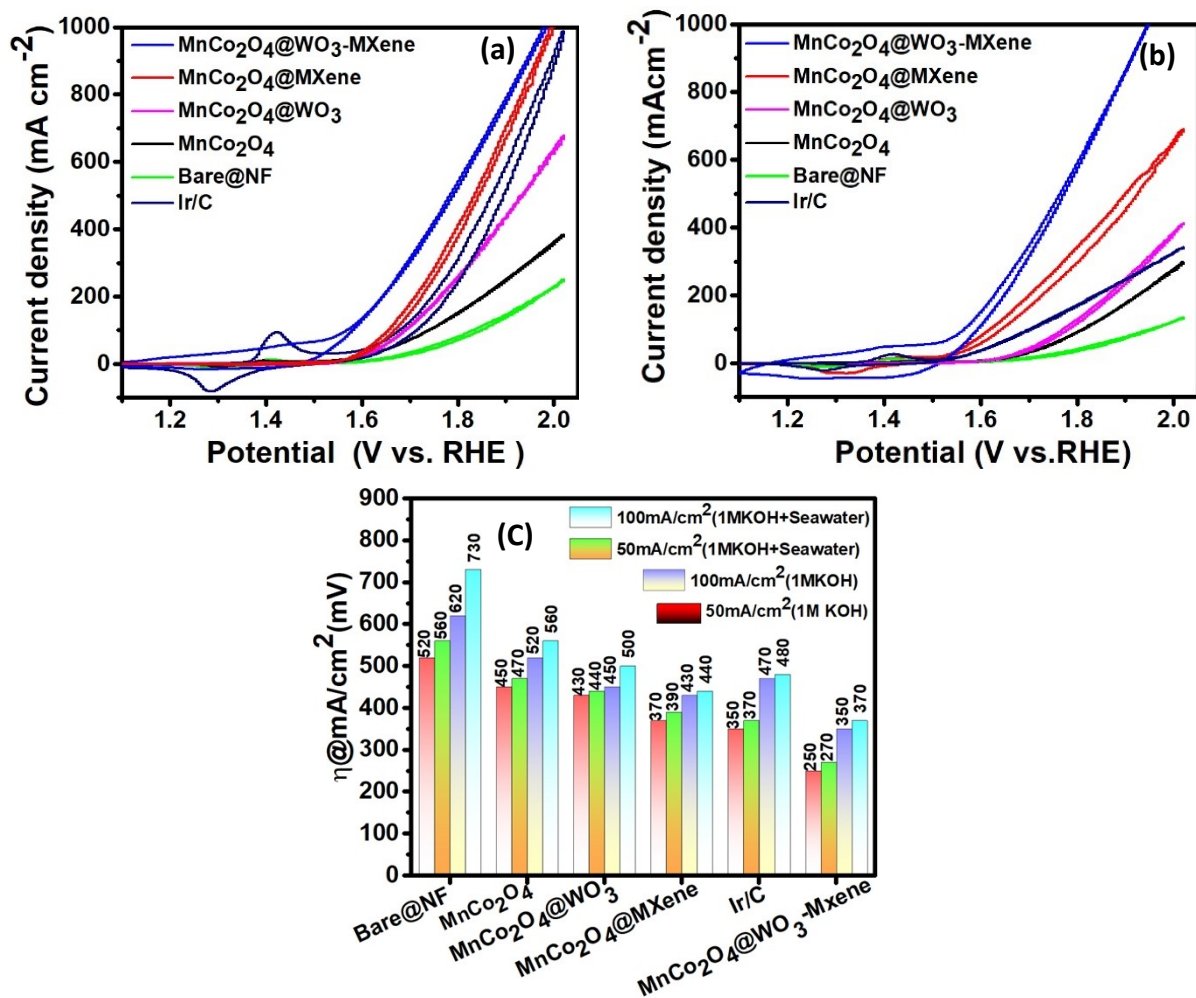

**Figure S11.** Without IR-corrected CV curve of MnCo<sub>2</sub>O<sub>4</sub>@WO<sub>3</sub>-MXene at a scan rate of 5 mV/s in (a) 1M KOH and (b) alkaline seawater. (c) Without IR-corrected overpotential of synthesized samples in 1M KOH and alkaline seawater.

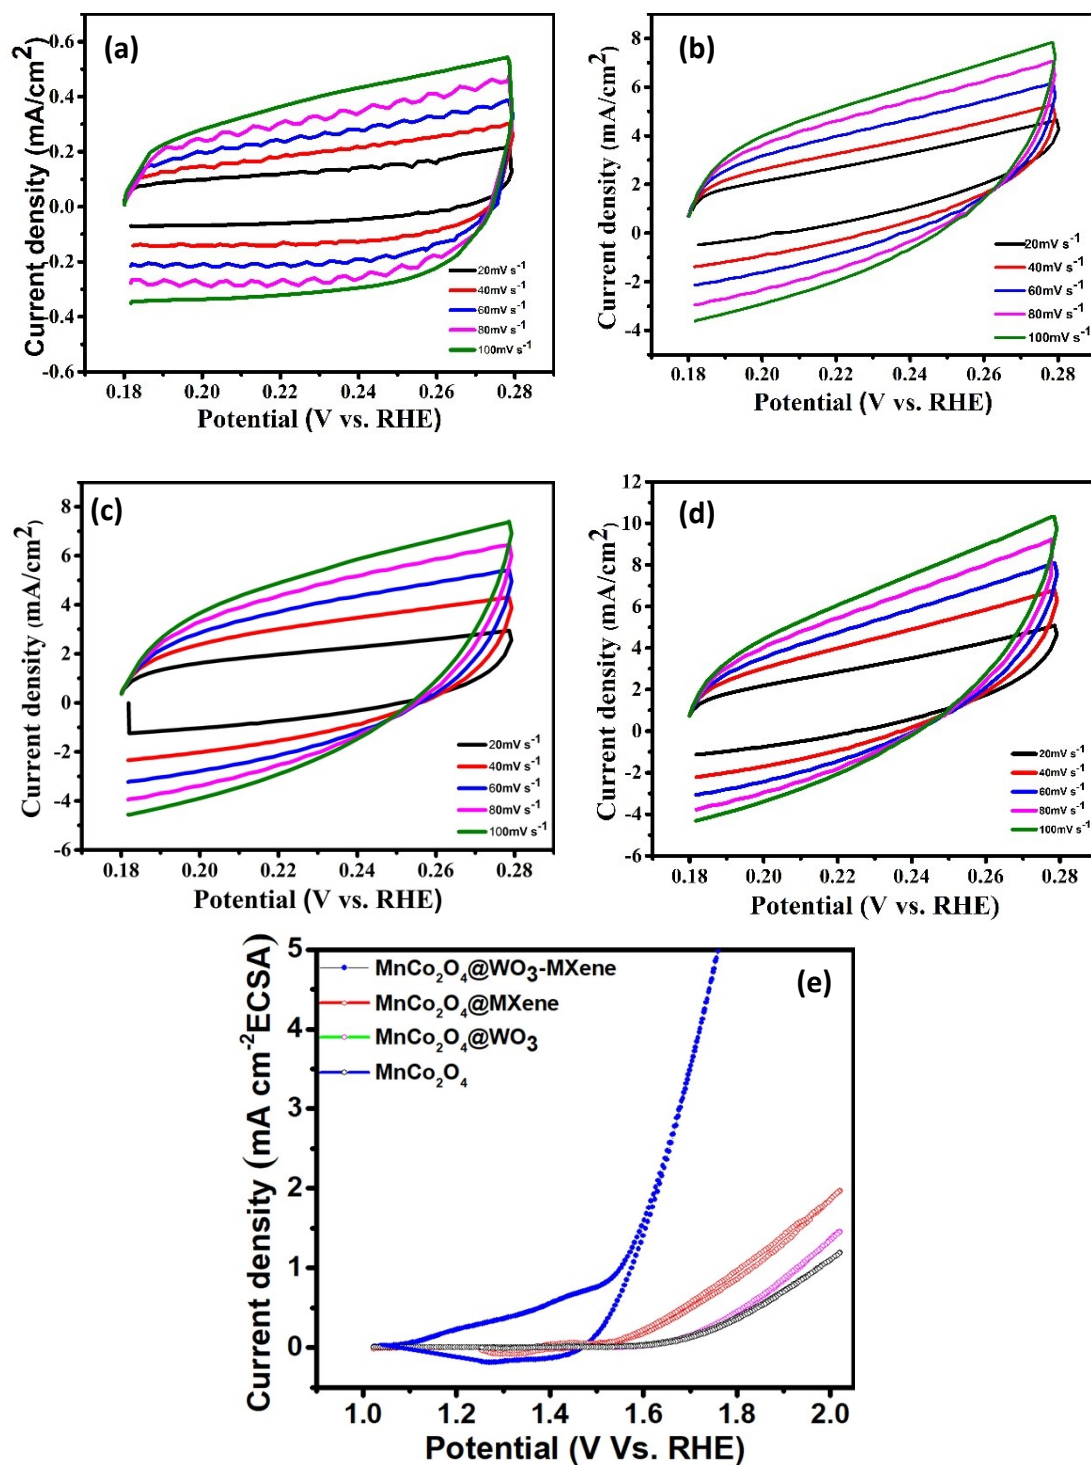

**Figure S12.** CV graphs of (a) MnCo<sub>2</sub>O<sub>4</sub>, (b) MnCo<sub>2</sub>O<sub>4</sub>-WO<sub>3</sub>, (C) MnCo<sub>2</sub>O<sub>4</sub>-MXene, (d) MnCo<sub>2</sub>O<sub>4</sub>-WO<sub>3</sub>-MXene, (e) ECSA-normalized polarization curves of the prepared samples.

**Table S9:** Cdl and ECSA calculation with CV curves for MnCo<sub>2</sub>O<sub>4</sub>, MnCo<sub>2</sub>O<sub>4</sub>@WO<sub>3</sub>, MnCo<sub>2</sub>O<sub>4</sub>@MXene, and MnCo<sub>2</sub>O<sub>4</sub>-WO<sub>3</sub>- MXene

| Parameters                       | C <sub>dl</sub> (mF) | ECSA (cm <sup>2</sup> ) |
|----------------------------------|----------------------|-------------------------|
| MnCo <sub>2</sub> O <sub>4</sub> | 10.06                | 251.5                   |

|                                                           |       |        |
|-----------------------------------------------------------|-------|--------|
| MnCo <sub>2</sub> O <sub>4</sub> @WO <sub>3</sub>         | 11.25 | 281.16 |
| MnCo <sub>2</sub> O <sub>4</sub> @MXene                   | 11.36 | 284.08 |
| MnCo <sub>2</sub> O <sub>4</sub> -WO <sub>3</sub> - MXene | 11.7  | 292.47 |

### Calculation of ECSA:

The ECSA of the catalyst is calculated from the double-layer capacitance according to the following equation: 1.

$$ECSA = \frac{C_{dl}}{C_s} \quad (1)$$

Where  $C_s$  is specific capacitance per unit area. The typical value of specific capacitance is 40  $\mu\text{F}/\text{cm}^2$  in 1M KOH and alkaline seawater solution, as reported in literature.

**Calculation of TOF:** The turnover frequency (TOF) can be calculated from the following equation:

$$TOF = j \times A / (4 \times F \times n)$$

Where  $j$  is the current density ( $\text{A cm}^{-2}$ ),  $A$  is the electrode area, 4 corresponds to the four-electron oxygen evolution reaction,  $F$  is the Faraday constant ( $96485.3 \text{ C mol}^{-1}$ ), and  $n$  is the number of moles of active material on the substrate. The value of  $n$  was calculated based on the catalyst loading mass and its molecular weight [1]. Because the exact nature and number of active sites are not fully understood, the number of active sites was estimated using ECSA for CoMnOx@WO<sub>3</sub>-MXene. In this estimation, each metal cation (Co or Mn) was assumed to represent one active site, which may lead to an underestimation of the actual TOF.

**Calculation of Mass activity:** To calculate mass activity ( $\text{A g}^{-1}$ ), the catalyst's loading density  $m$  and the measured current density  $j$  ( $\text{mA cm}^{-2}$ ) at  $\eta=1.55 \text{ V}$ . The equation for mass activity is as follows.

$$\text{Mass activity} = j/m$$

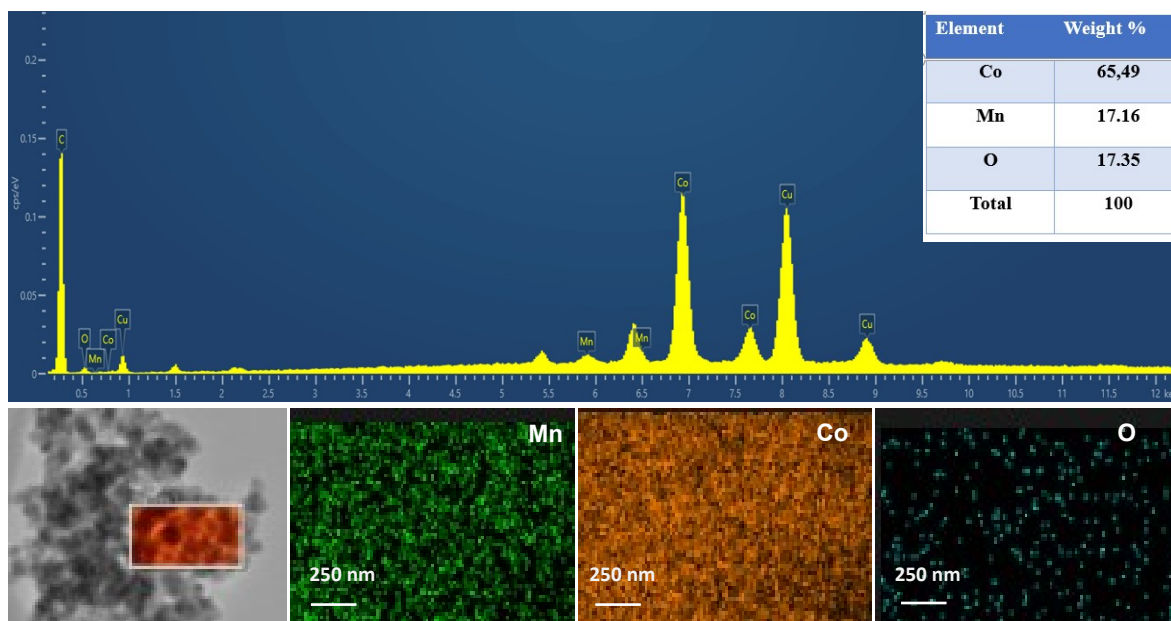

**Figure S13.** EDS mapping of CoMnOx. (inset shows the weight percent of the composition).

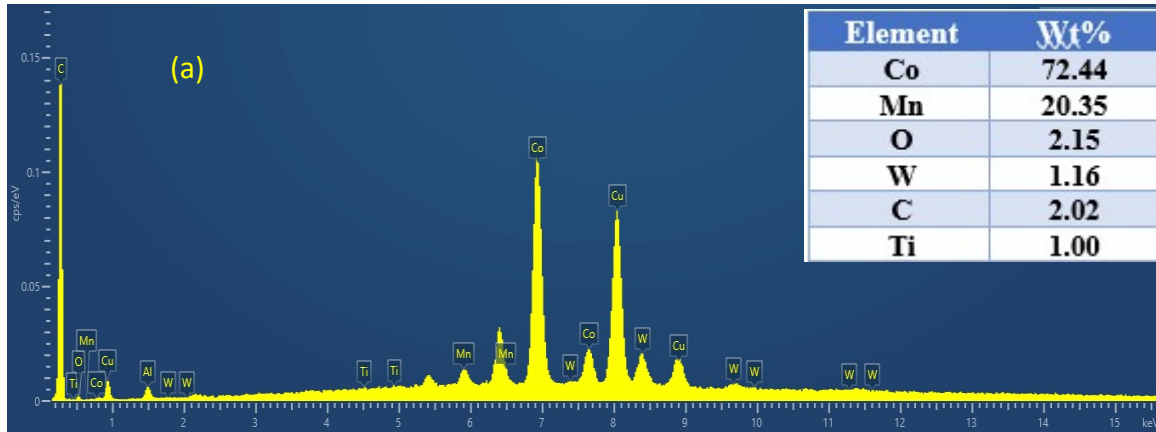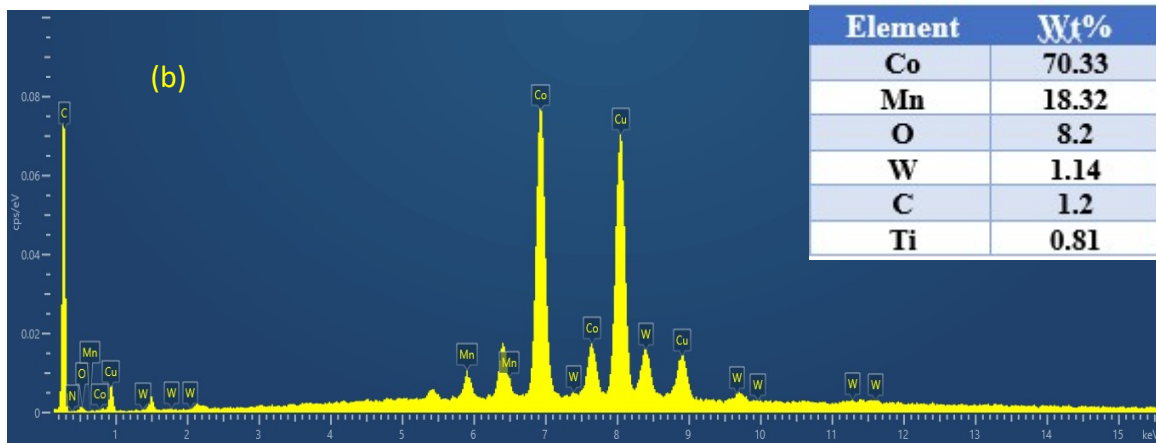

**Figure S14.** EDS mapping of CoMnOx@WO<sub>3</sub>-MXene (a) before and (b) after a 100-hour stability test. (inset shows the weight percent of the composition).

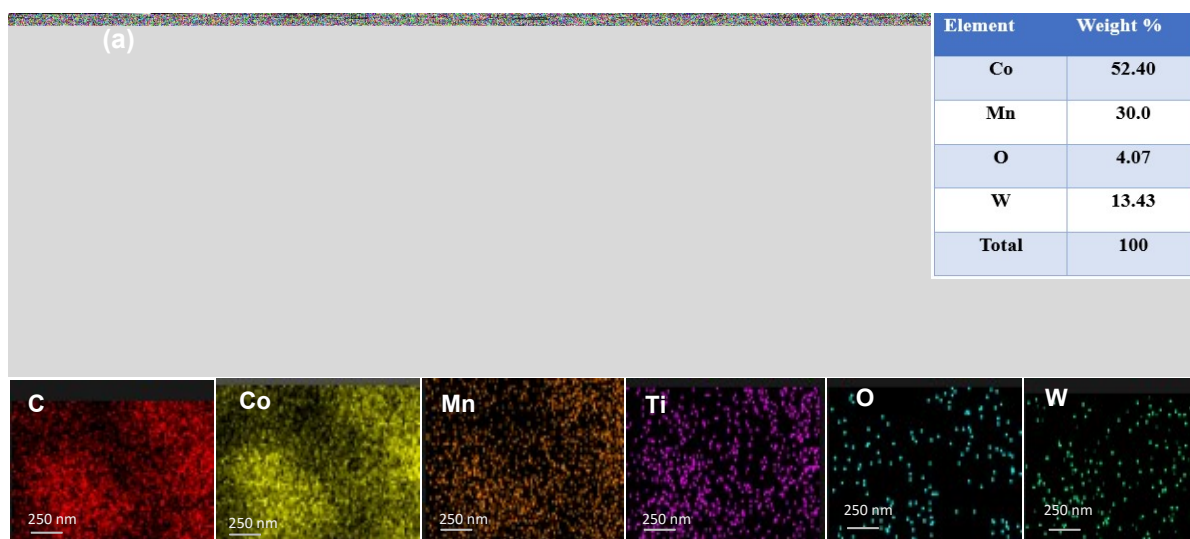

**Figure S15.** EDS mapping of CoMnOx@WO<sub>3</sub> (inset shows the weight percent of the composition).

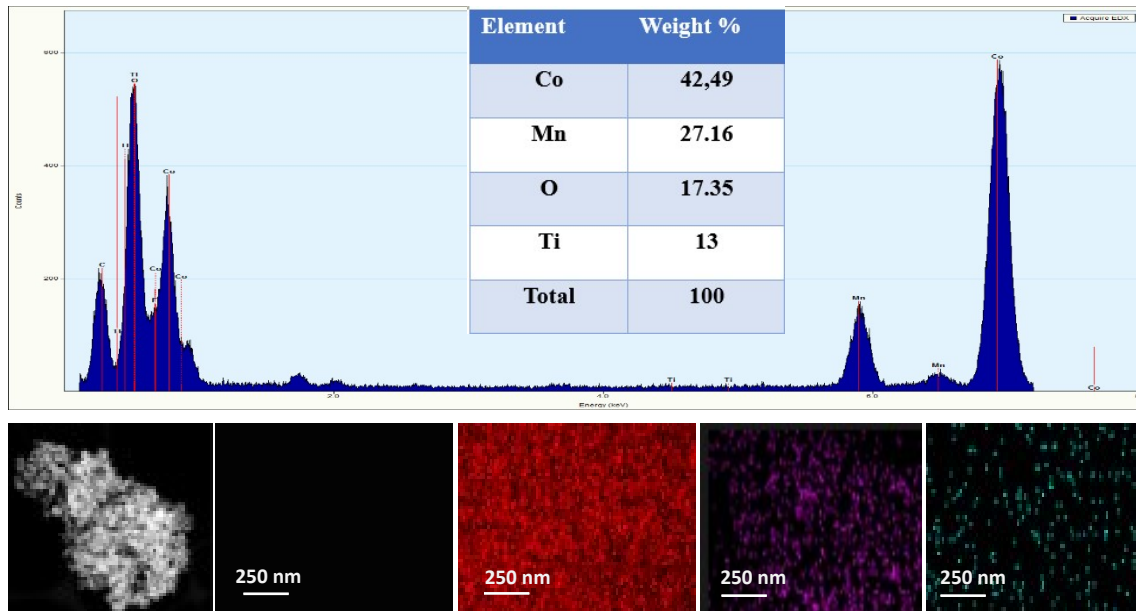

**Figure S16.** EDS mapping of CoMnOx@MXene. (inset shows the weight percent of the composition).

**Table S10.** Post stability ICP-OES data

| S.No.              | Co (pbb) | Mn (pbb) | W (pbb) | Ti (pbb) |
|--------------------|----------|----------|---------|----------|
| 1                  | 22.725   | 24.503   | 3.12    | 4.26     |
| 2                  | 21.370   | 24.985   | 3.05    | 4.01     |
| Mean               | 22.0475  | 24.744   | 3.085   | 4.135    |
| Standard deviation | 0.95     | 0.34     | 0.04    | 0.17     |

**Co-precipitation method for large-scale production:**

In this current work, the samples were synthesized using the facile co-precipitation method. The method is suitable for large-scale production due to its simplicity, use of solution-based processing, and need for low energy. The precursors used are inexpensive and widely used commercially. The overall synthesis process is highly cost-effective. The reaction is carried out without the need for high pressure and does not need specialized equipment or any complex multistep procedure, making this method easy to use.

**Precursor cost:**

The precursors used in the synthesis process, such as cobalt nitrate, manganese nitrate, NaOH (sodium hydroxide), and  $WO_3$  (tungsten trioxide), are inexpensive and commercially available in bulk. Maxine is relatively more costly but used in a small quantity. To prove the cost-effectiveness of the synthesized sample, the cost of the catalyst is compared with the state-of-the-art OER catalyst. The overall cost of all precursors is around 200-230/g for lab synthesis. This cost could be extensively reduced with bulk production. In contrast, the same quantity of  $RuO_2$  costs around 6,000-9,000, and  $IrO_2$  will cost 12,000-18,000.

| Catalyst                | Composition     | Average cost/gram | Remark                       |
|-------------------------|-----------------|-------------------|------------------------------|
| $RuO_2$                 | Nobel metal     | 5000-8000         | Very high cost<br>Scarcity   |
| $IrO_2$                 | Nobel metal     | 11000-15000       | High cost<br>Stability issue |
| $MnCo_2O_4@WO_3$ -MXene | Non-Nobel metal | 200-230           | Low cost                     |

**Reproducibility:**

In terms of reproducibility, the coprecipitation method is an excellent option. With reaction parameters such as temperature, precursor concentration, and pH, the process can easily be controlled for reproducibility for large batches.

**Challenges:**

- **Need of CTAB:** To corroborate the importance of the CTAB surfactant, the  $\text{MnCo}_2\text{O}_4@\text{WO}_3\text{-MXene}$  was synthesized with and without CTAB and investigated for its corresponding OER performance. The HRTEM image (Figure S8) reveals a significant increase in particle size for the catalyst synthesized without CTAB as compared to the CTAB-assisted samples. The results exhibit that the CTAB acts as a very essential surfactant and effectively controls morphology and prevents particle agglomeration. The electrochemical analysis (Figure S9) demonstrates that, in 1M KOH, the overpotential decreases from 350 mV (without CTAB) to 330 mV (with CTAB) to achieve a current density of  $100 \text{ mA/cm}^2$ , while in seawater, the overpotential decreased from 380 mV (without CTAB) to 350 mV (with CTAB) to achieve the same current density. Similar trends have been followed by the other samples. The improved performance can be attributed to the role of CTAB as a structure-directing surfactant, which facilitates nucleation and growth, promotes uniform nanocube formation, and prevents particle agglomeration during synthesis to ensure better distribution on the MXene sheet. In addition, the use of CTAB during the synthesis improves the product yield.

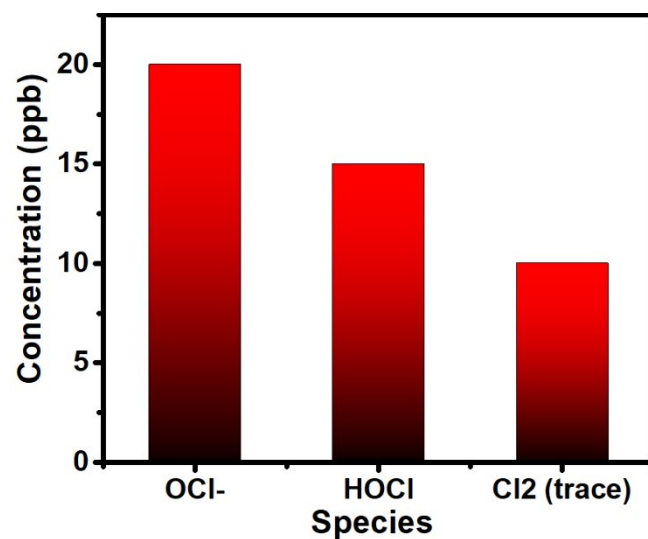

**Figure S17.** UPLC-MS quantified concentration of chlorine-containing species after stability alkaline seawater electrolysis.

**Table S11:** Literature review to compare the performance of different catalysts

Our work in 1 M KOH and 1 M KOH + seawater is compared to recent OER electrocatalysts.

| S. N. | Catalyst                                                                        | Electrolyte                  | J<br>mA<br>cm <sup>-2</sup> | $\eta$ (mV) | Stability<br>(hours)                    | Refe               |
|-------|---------------------------------------------------------------------------------|------------------------------|-----------------------------|-------------|-----------------------------------------|--------------------|
| 1     | Ru/NiO                                                                          | 1 M KOH<br>1 M KOH +seawater | 50                          | 240<br>400  | 100 hours at<br>100 mAcm <sup>-2</sup>  | [2]                |
| 2     | Nb-WO <sub>3</sub> /WS <sub>2</sub>                                             | 1 M KOH +seawater            | 50                          | 320         | 100 hours at<br>100 mAcm <sup>-2</sup>  | [3]                |
| 3     | NiCo <sub>2</sub> O <sub>4</sub> /MXene                                         | 1 M KOH                      | 50                          | 390         | 14 hours                                | [4]                |
| 4     | MnCo <sub>2</sub> O <sub>4</sub> @CoS<br>hybrid                                 | 1 M KOH<br>1 M KOH seawater  | 50                          | 270<br>350  | 50 hours at<br>100 mAcm <sup>-2</sup>   | [5]                |
| 5     | S-HEO/rGO                                                                       | 1 M KOH<br>1 M KOH seawater  | 50                          | 320<br>370  | 100 hours at<br>10 mAcm <sup>-2</sup>   | [6]                |
| 6     | NiCoP nano<br>needle grown on<br>Ti <sub>3</sub> C <sub>2</sub> T <sub>x</sub>  | 1 M KOH                      | 50                          | 303         | 50 hours at<br>50mA cm <sup>-2</sup>    | [7]                |
| 7     | NiHf-<br>LDH/MXene/NF                                                           | 1 M KOH<br>1 M KOH seawater  | 50                          | 230<br>290  | 150 hours at<br>100 mA cm <sup>-2</sup> | [8]                |
| 8     | CeMnCo <sub>2</sub> O <sub>4</sub>                                              | 11 M KOH                     | 50                          | 420         | 50 hours at 10<br>mA cm <sup>-2</sup>   | [9]                |
| 9     | CeO <sub>x</sub> @NiCo <sub>2</sub> O <sub>4</sub><br>Arrays                    | 1 M KOH<br>1 M KOH +seawater | 50                          | 290<br>300  | 60 hours at<br>100 mAcm <sup>-2</sup>   | [10]               |
| 10    | B-Co <sub>2</sub> Fe LDH                                                        | 1 M KOH<br>1 M KOH +seawater | 50                          | 220<br>290  | 100 hours at<br>500 mAcm <sup>-2</sup>  | [1]                |
| 11    | MoO <sub>3</sub> /Fe <sub>2</sub> O <sub>3</sub> /M<br>oS <sub>2</sub>          | 1 M KOH<br>1 M KOH +seawater | 50                          | 290<br>340  | 100 hours at<br>300 mAcm <sup>-2</sup>  | [11]               |
| 12    | CuCo <sub>2</sub> O <sub>4</sub> /Ti <sub>3</sub> C <sub>2</sub> T <sub>x</sub> | 1 M KOH                      | 50                          | 420         | 5 hours at 10<br>mA cm <sup>-2</sup>    | [12]               |
| 13    | Co-Fe <sub>2</sub> P                                                            | 1 M KOH<br>1 M KOH +seawater | 50                          | 250<br>400  | 20 hours at<br>250 mA cm <sup>-2</sup>  | [13]               |
| 14    | (NiCoMnCrFe) <sub>3</sub><br>O <sub>4</sub>                                     | 1 M KOH<br>1 M KOH +seawater | 50                          | 240<br>320  | 160 hours at                            | [14]               |
| 15    | (FeCoNiMnCr) <sub>3</sub><br>O <sub>4</sub>                                     | 1 M KOH<br>1 M KOH +seawater | 50                          | 323<br>348  | 60 hours at<br>100 mAcm <sup>-2</sup>   | [15]               |
| 16    | MnCo <sub>2</sub> O <sub>4</sub> @WO<br>3-MXene                                 | 1 M KOH<br>1 M KOH +seawater | 50                          | 230<br>250  | 100 hours at<br>500 mAcm <sup>-2</sup>  | In<br>this<br>work |

- [1] L. Wu, L. Yu, Q. Zhu, B. McElhenny, F. Zhang, C. Wu, X. Xing, J. Bao, S. Chen, Z. Ren, Boron-modified cobalt iron layered double hydroxides for high efficiency seawater oxidation, *Nano Energy*, 83 (2021) 105838.
- [2] H. Luo, T. Zhou, R. Xia, Z. Guo, Reconstructed Monolithic RuNi Heterostructure Enables Hydrogen Production from Alkaline Seawater at Industrial Current Density, *Advanced Science*, 12 (2025) e10916.
- [3] L. Yang, Z. Xing, Y. Chen, M. Yang, W. Liu, K. Qin, X. Sun, Q. Li, M. Xiao, Z. Jia, Anion Shielding in Nb-WO<sub>3</sub>/WS<sub>2</sub> Heterostructures: A Strategy for Efficient and Corrosion-Resistant Seawater Electrolysis, *Small*, 21 (2025) e09761.
- [4] A. Vazhayil, L. Vazhayal, S. Ashok C, J. Thomas, N. Thomas, NiCo<sub>2</sub>O<sub>4</sub>/MXene hybrid as an efficient bifunctional electrocatalyst for oxygen evolution and reduction reaction, *ChemCatChem*, 16 (2024) e202301250.
- [5] M.A. Khan, Y. Liu, M. Hayat, F. Lu, M. Zhou, Tuning the sulfide interface of MnCo<sub>2</sub>O<sub>4</sub>-based nanostructures enables efficient water/seawater electrolysis, *International Journal of Hydrogen Energy*, 89 (2024) 1-9.
- [6] Y.S.S. Sarma, A. Ghosh, M. Jaiswal, S. Bhattacharya, S. Ramaprabhu, A spinel based high entropy oxide (Co, Fe, Mn, Ni, Li) <sub>3</sub>O<sub>4</sub> and reduced graphene oxide composite anode for seawater electrolysis, *International Journal of Hydrogen Energy*, 130 (2025) 54-63.
- [7] M. Jeong, S. Park, T. Kwon, M. Kwon, S. Yuk, S. Kim, C. Yeon, C.-W. Lee, D. Lee, Interface Engineering via Ti<sub>3</sub>C<sub>2</sub>T<sub>x</sub> MXene Enabled Highly Efficient Bifunctional NiCoP Array Catalysts for Alkaline Water Splitting, *ACS Applied Materials & Interfaces*, 16 (2024) 34798-34808.
- [8] D. Chauhan, M. Itagi, Y.-H. Ahn, Seawater electrolysis incorporating NiHf-LDH/MXene/NF high-performance electrocatalysts, *International Journal of Hydrogen Energy*, 198 (2026) 152735.
- [9] X. Huang, H. Zheng, G. Lu, P. Wang, L. Xing, J. Wang, G. Wang, Enhanced water splitting electrocatalysis over MnCo<sub>2</sub>O<sub>4</sub> via introduction of suitable Ce content, *ACS Sustainable Chemistry & Engineering*, 7 (2018) 1169-1177.
- [10] W. Liu, J. Zhao, L. Dai, Y. Qi, K. Liang, J. Bao, Y. Ren, Interface Engineering Overall Seawater Splitting of Self-Supporting CeO<sub>x</sub>@ NiCo<sub>2</sub>O<sub>4</sub> Arrays, *Inorganic Chemistry*, 63 (2024) 6016-6025.
- [11] Z. Li, W. Tao, Y. Wang, X. Ye, Y. Chen, B. Han, L.Y.S. Lee, Corrosion-Resistant MoO<sub>3</sub>/Fe<sub>2</sub>O<sub>3</sub>/MoS<sub>2</sub> Heterojunctions Stabilize OH-Adsorption for Efficient Light-Assisted Seawater Electrooxidation, *Journal of the American Chemical Society*, 147 (2025) 24461-24472.
- [12] S. Ghorbanzadeh, S. Hosseini, M. Alishahi, CuCo<sub>2</sub>O<sub>4</sub>/Ti<sub>3</sub>C<sub>2</sub>T<sub>x</sub> MXene hybrid electrocatalysts for oxygen evolution reaction of water splitting, *Journal of Alloys and Compounds*, 920 (2022) 165811.
- [13] S. Wang, P. Yang, X. Sun, H. Xing, J. Hu, P. Chen, Z. Cui, W. Zhu, Z. Ma, Synthesis of 3D heterostructure Co-doped Fe<sub>2</sub>P electrocatalyst for overall seawater electrolysis, *Applied Catalysis B: Environmental*, 297 (2021) 120386.
- [14] J. Fan, X. Xiang, Y. Liu, X. Yang, N. Shi, D. Xu, C. Zhou, M. Han, J. Bao, W. Huang, Defect-rich high-entropy spinel oxide as an efficient and robust oxygen evolution catalyst for seawater electrolysis, *SusMat*, 5 (2025) e70010.
- [15] B. Du, J. Zeng, R. Tang, Y. Li, Q. Hao, F. Wang, L. Liang, H. Liu, High-entropy spinel (FeCoNiMnCr) <sub>3</sub> O <sub>4</sub> nanoparticles supported on carbon nanotubes for enhanced electrochemical seawater oxidation, *Chemical Communications*, 61 (2025) 15614-15617.
